# Supplementary material for: Membrane Localization and Phosphorylation of Indoleamine 2,3-Dioxygenase 2 (IDO2) in A549 Human Lung Adenocarcinoma Cells: First Steps in Exploring Its Signaling Function
Source: MDPI journal article supplement (doi:10.3390/ijms242216236), 2023-11-12
Supplement: s1 [file s1]

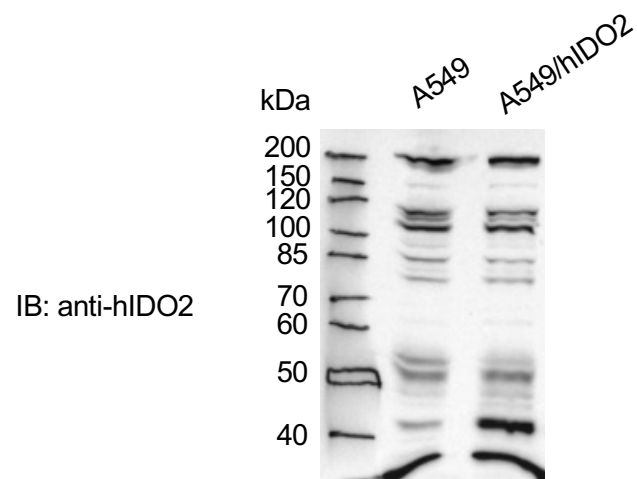

**Figure S1.** Full-size image of the Western blotting analysis of IDO2 protein expression (MW= 42 kDa) in A549 and A549/hIDO2 whole-cell lysates with the rabbit polyclonal anti-hIDO2 antibody I23O2.
